# Supplementary material
Source: publisher figshare collection journal article supplement (https://sage.figshare.com/ndownloader/files/13836332)
Supplement: Supplementary file 1 [file 13836332]

## Supplemental file

### Demographic characteristics of participants of a photovoice study about suicide among gay, bisexual and two-spirit men (N=29)

| Characteristics        | n (%)                       |
|------------------------|-----------------------------|
| <b>Age</b>             | Mean = 45<br>Range 23 to 71 |
| <b>Sexual identity</b> |                             |
| Gay                    | 22 (75.9)                   |
| Bisexual               | 5 (17.2)                    |
| Two-Spirit             | 2 (6.9)                     |
| <b>Employment</b>      |                             |
| Employed               | 11 (37.9)                   |
| Self-employed          | 3 (10.3)                    |
| Unemployed             | 6 (20.7)                    |
| Retired                | 4 (13.8)                    |
| Disability             | 4 (13.8)                    |
| Student                | 1 (3.4)                     |
| <b>Education</b>       |                             |

|                                 |           |
|---------------------------------|-----------|
| High School (some or completed) | 8 (27.6)  |
| Some college or university      | 6 (20.7)  |
| Bachelor degree                 | 7 (24.1)  |
| Graduate degree                 | 6 (20.7)  |
| Did not answer                  | 2 (6.9)   |
| <b>Ethnicity</b>                |           |
| Caucasian                       | 21 (72.4) |
| Asian                           | 4 (13.8)  |
| Indigenous                      | 3 (10.3)  |
| Métis                           | 1 (3.4)   |
| <b>Relationship status</b>      |           |
| Single                          | 18 (62.1) |
| Married or partnered            | 6 (20.7)  |
| Divorced or separated           | 3 (10.3)  |
| Widowed                         | 1 (3.4)   |
| Did not answer                  | 1 (3.4)   |
